# Supplementary material for: Corneal Adhesion Possesses the Characteristics of Solid and Membrane
Source: MDPI journal article supplement (doi:10.3390/bioengineering9080394), 2022-08-16
Supplement: s1 [file s1]

## Supplementary Information for: Corneal adhesion possesses the characteristics of solid and membrane

### Supplementary information I: Measuring the adhesion behavior of cornea performed the indentation-detachment test

This section was the supplementary for the sketching picture (Figure 1), which was used to describe the pull-off test performed to determine the adhesion behavior of cornea. Each eye specimen, in this study, was tested by seven different punches with different radii, 0.5 mm, 1.0 mm, 2.0 mm, 2.5 mm, 3.0 mm, 4.0 mm, and 5.0 mm, respectively. The related images captured through CCD were as shown in Figure S1.

All seven punches were used to determine the corneal adhesion behavior during the eye was under the normal IOP of 20 mmHg and 30 mmHg. Refer to the related literature, the normal IOP varies from individual to individual and is in the range of 1.5 – 4 kPa, i.e., approximately 10 – 30 mmHg[27]. In order to verify the influence from the variation of IOP, four punches, respectively with the radii of 1.0 mm, 2.0 mm, 3.0 mm, and 4.0 mm, were also used to performed the pull-off test during the eye was under the higher *P* values of 40 mmHg, 50 mmHg, and 60 mmHg.

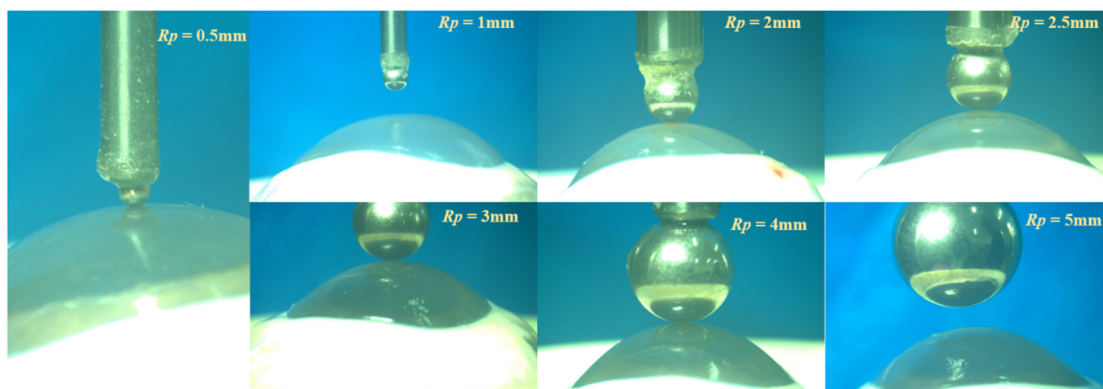

**Figure S1.** Images captured through CCD. The seven pictures show the comparison of the sizes between the punches and the cornea.

## Supplementary information II: Appendix of the mathematical derivation for the adhesion force between the interface

As shown in Figure S2, a flat-cylindric punch indents a semi-infinite solid, the related contact force  $F$ , solved by Sneddon (1965) [23], can be written as

$$F = \frac{4G_m a \delta}{1 - \nu_m}, \quad (\text{S1})$$

where  $a$  and  $\delta$  are the contact radius and indentation depth, respectively. And  $G_m$  and  $\nu_m$  are the shear modulus and Poisson's ratio of the material, respectively. The shear modulus  $G_m$  can be described by the elastic modulus  $E$  as  $G_m = E_m / 2(1 + \nu_m)$ , thus the contact force  $F$  can also be formulated as

$$F = \frac{2a\delta E_m}{1 - \nu_m^2}. \quad (\text{S2})$$

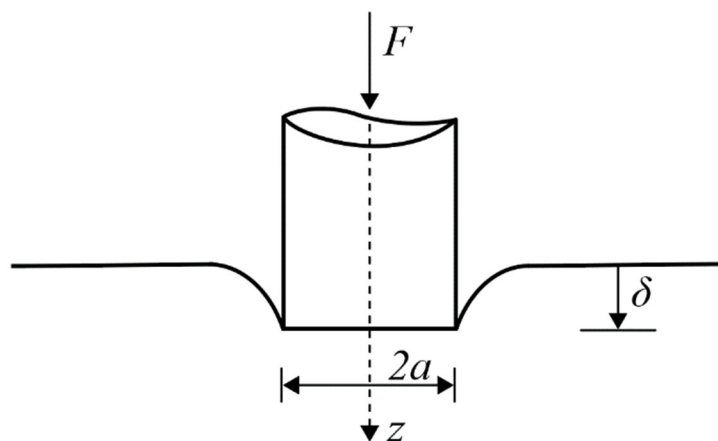

**Figure S2.** Sketching for a flat-cylindrical punch indents a semi-infinite solid.

According to the elastic theory, the effective elastic modulus  $E^*$  of the indentation behavior can be written as

$$\frac{1}{E^*} = \frac{1 - \nu_p^2}{E_p} + \frac{1 - \nu_m^2}{E_m}, \quad (\text{S3})$$

where  $E_p$  and  $\nu_p$  are the elastic modulus and Poisson's ratio of the punch, respectively. In case of that the punch is much stiffer than the material, for example, a steel punch with  $E_p$  of hundreds of GPa and a biological soft tissue with  $E_m$  of hundreds of kPa, the first term of the right hand in Eq. (S3) can be neglected. In this sense, the effective  $E^*$  can also be simply formulated as  $E^* \approx E_m / (1 - \nu_m^2)$ . Thus, Eq. (S2) is simply written as

$$F = 2a\delta E^* . \quad (S4)$$

If the mechanical property of the material appears linear behavior, the related stiffness  $K$  can be defined as

$$K = \frac{F}{\delta} = 2aE^* . \quad (S5)$$

Kendall (1971) studied the adhesion behavior between a rigid flat-cylindric punch and an elastic substrate, through observing the punch contacted to and then detached from the substrate [27]. Based on the Griffith's energy criterion, he found that the pull-off force (i.e., adhesion force  $F_{ad}$ ) of the punch detached from the substrate is

$$F_{pull-off} = F_{ad} = -\sqrt{8\pi\gamma E^* a^3} , \quad (S6)$$

where  $\gamma$  is the work of adhesion, which means that the adhesion energy per unit contact area. The minus sign means the tensile direction. The corresponding deriving process is as follows.

A rigid punch indents to a soft material and then detaches from it, as shown in Figure S3, the related total potential energy  $U_T$  required for the detachment process is

$$U_T = U_E + U_{Surf} + U_F , \quad (S7)$$

where  $U_E$ ,  $U_{Surf}$ , and  $U_F$  are the elastic strain energy of the substrate, the additional surface energy, and the work of external force, respectively.

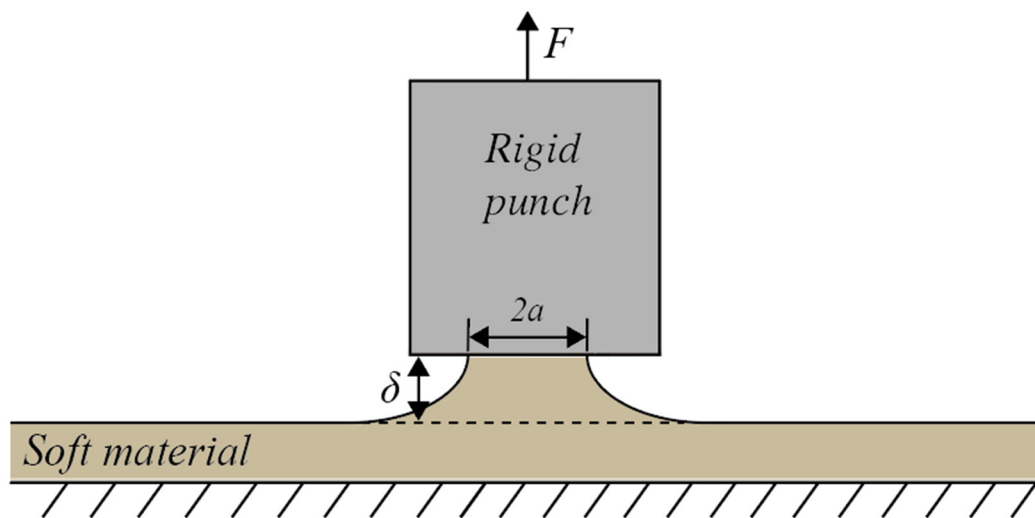

**Figure S3.** Sketching for a rigid punch detaches from a soft material.

For the linear adhesion behavior,  $U_E$ ,  $U_F$ , and  $U_{Surf}$  are respectively formulated as

$$\begin{cases} U_E = \frac{1}{2} F \delta = \frac{1}{2} \frac{F^2}{K} \\ U_F = -F \delta = -\frac{F^2}{K} \\ U_{Surf} = \pi a^2 \gamma \end{cases} \quad (S8)$$

During the detachment, the adhesion force will appear at the critical contact area where the pull-in process transforms into pull-off process and the pull-off force reaches maximum value (Figure 1b). In mathematics, therefore, there is

$$\begin{aligned} \frac{\partial U_T}{\partial a} = 0 &\Rightarrow \frac{\partial}{\partial a} \left( \frac{F^2}{2K} - \frac{F^2}{K} + \pi a^2 \gamma \right) \\ &= \frac{\partial}{\partial a} \left( \pi a^2 \gamma - \frac{F^2}{4aE^*} \right) \\ &= 2\pi \gamma a + \frac{F^2}{4E^*} \frac{1}{a^2} = 0 \\ &\Rightarrow F = -\sqrt{8\pi \gamma E^*} a^3 \end{aligned} \quad (S9)$$

### Supplementary information III: Appendix derivation related to the contact behavior of a rigid sphere indents a soft spherical solid (JKR model)

As shown in Figure S4, Hertz (1896) [22] first solved the contact problem between two rigid spheres, which can be written as

$$\begin{cases} a^3 = \frac{3FR}{4E^*} \\ \delta = \frac{a^2}{R} \end{cases}, \quad (S10)$$

where  $R$  is the derived radius,  $1/R = 1/R_p + 1/R_m$ . Based on the Hertz solution, Johnson et al. (1971) [6] reported the solution of the contact between a rigid sphere and a compliance solid, i.e., the Johnson-Kendall-Roberts (JKR) model formulated as

$$\begin{cases} a^3 = \frac{3R}{4E^*} \left[ F + 3\gamma\pi R + \sqrt{6\gamma\pi RF + (3\gamma\pi R)^2} \right] \\ \delta = \frac{a^2}{R} - \sqrt{\frac{2\pi\gamma a}{E^*}} \end{cases}. \quad (S11)$$

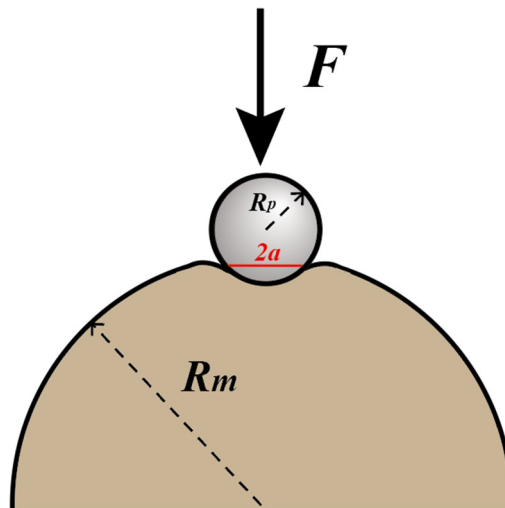

**Figure S4.** Sketching for the contact mechanics between two spheres.

In JKR model, when  $\gamma = 0$  the formula reverts to the simple Hertz equation. At zero applied load, the contact area is finite and given by

$$a_0^3 = \frac{3R}{4E^*} (6\gamma\pi R), \quad (S12)$$

where  $a_0$  is contact radius when applied force is zero. In this study, Eq. (S12) is used to calculate the effective elastic modulus  $E^*$  of cornea.

During the punch detaches from the compliance soft solid, the applied load is made negative and the contact radius decreases. The related limiting condition of JKR model is as follows

$$\sqrt{6\gamma\pi RF + (3\gamma\pi R)^2} \geq 0 \Rightarrow F \geq -\frac{3}{2}\gamma\pi R. \quad (\text{S13})$$

Separation will just occur when the pull-off force or adhesion force reaches the maximum value in Eq. (S13), i.e.,

$$F_{\text{pull-off}} = F_{\text{ad}} = -\frac{3}{2}\gamma\pi R. \quad (\text{S14})$$

Another method can also obtain the adhesion value of JKR model is  $1.5\gamma\pi R$  through analyzing the equilibrium of the detachment process. As shown in Figure S4 and Figure 1c, a rigid sphere indents and then detaches from a soft spherical solid, the sum force is contributed from two terms, the Hertz contact force, and the interface adhesion force. Accordingly, the related sum force is formulated as

$$F^{\text{solid}} = \underbrace{\frac{4E^*a^3}{3R}}_{\text{Hertz}} - \underbrace{\sqrt{8\gamma\pi E^*a^3}}_{\text{Kendall}}. \quad (\text{S15})$$

The separation happens when Eq. (S15) appears extreme value, that means

$$\begin{aligned} \frac{\partial F}{\partial a} &= \frac{4E^*}{R}a^2 - 3\sqrt{2\gamma\pi E^*}\sqrt{a} = 0 \\ \Rightarrow a_c &= \left(\frac{9}{8}\frac{\gamma\pi R^2}{E^*}\right)^{\frac{1}{3}}, \end{aligned} \quad (\text{S16})$$

where  $a_c$  is the critical contact radius. Substituting the formula Eq. (S16) of  $a_c$  into the equilibrium equation Eq. (S15), the adhesion force is solved as follows

$$\begin{aligned} F_{\text{ad}} = F_{\text{max}}^{\text{solid}} &= \frac{4E^*a_c^3}{3R} - \sqrt{8\gamma\pi E^*a_c^3} \\ &= \frac{4E^*}{3R} \frac{9}{8} \frac{\gamma\pi R^2}{E^*} - \sqrt{8\gamma\pi E^* \frac{9}{8} \frac{\gamma\pi R^2}{E^*}} \\ &= \frac{3}{2}\gamma\pi R - 3\gamma\pi R \\ &= -\frac{3}{2}\gamma\pi R \end{aligned} \quad (\text{S17})$$

# Supplementary Information IV: The comparisons of the corneal adhesion forces between the experimental and the theoretical data

This section is the supplementary for the comparison results shown as in Figure 4. In this study, we calculated the corneal adhesion force  $F_{ad}$  through the JKR and the modified-JKR models. The related JKR solutions were obtained through the classical formula of  $1.5\gamma\pi R$ , while the related modified-JKR solutions were obtained through the formula of Eq. (2) proposed here with the constant coefficient  $\alpha$  were equal to 0.1, 0.2, 0.3, 0.4, and 0.5. The detailed calculation results were as shown in Figure S5.

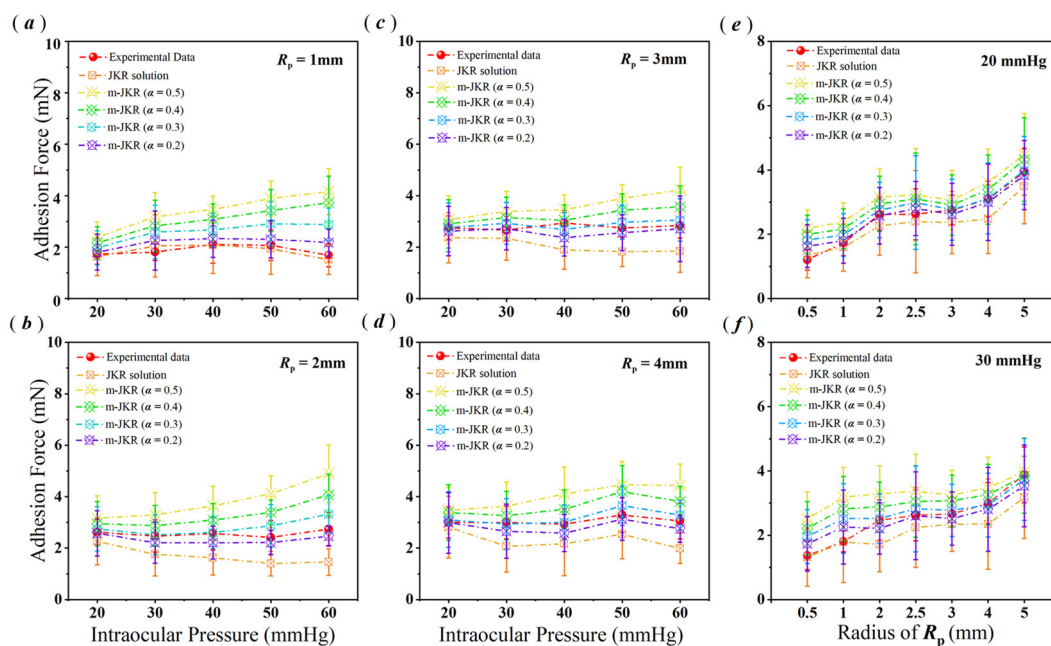

**Figure S5.** Supplementary comparisons of the corneal adhesion force  $F_{ad}$  obtained from the experiment and theories, including the JKR solutions and the modified JKR solutions with  $\alpha$  equals to 0.1, 0.2, 0.3, 0.4, and 0.5. (a)-(d) show the comparisons with different IOPs. (e)-(f) show the comparisons of the scale effect of the corneal adhesion under the normal IOP of 20 mmHg and 30 mmHg (the data presented as **mean  $\pm$  s.d.**, and the abbreviations of JKR sol and m-JKR indicate the solutions from JKR and modified-JKR models, respectively).

In terms of the modified-JKR model used here, the coefficient  $\alpha$  indicated the degree of the corneal adhesion trending to the characteristic of membrane. The classical JKR model,  $1.5\gamma\pi R$ , could be also obtained by the modified-JKR model with  $\alpha = 0$ . Figure 4 and Figure S5 in this study, therefore, showed the comparisons between the experimental data and the modified-JKR solutions with  $\alpha$  were in the range from 0 to 0.5.

### Supplementary Information V: The detailed derivation process of the surface tension term in Eq. 1

In the study, the modified JKR model was derived from the force analysis of a pure membranous material. Imaging the situation that a spherical rigid punch contacted with a spherical thin-film, which was inflated by air, such as, an inflated balloon. The equilibrium of the spherical thin-film was affected by the air pressures, the indentation loading (Hertz force), the surface adhesion (Kendall adhesion), and the membranous tension (Figure S6).

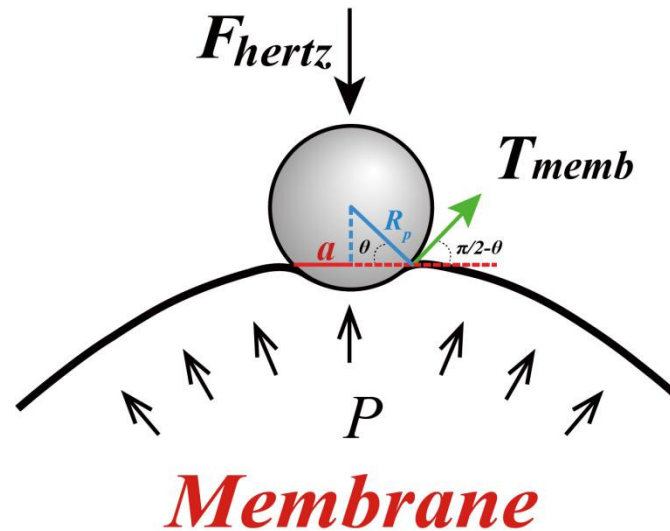

**Figure S6.** The contact between a small rigid sphere between an inflated thin-spherical film.

According to the sketching of the above force analysis, and assumption the indentation direction was the positive, the related equilibrium equation could be written as

$$F = \frac{4E^*a^3}{3R} - \sqrt{8\pi\gamma E^*a^3} - P\pi a^2 - 2\pi a \left( \frac{PR_m}{2} \right) \sin \left( \frac{\pi}{2} - \theta \right) \quad (\text{S18})$$

where  $a$  is the contact radius,  $\gamma$  the work of adhesion,  $P$  the air pressure,  $E^*$  and  $R$  the effective elastic modulus and the radius, respectively. Here,  $1/E^* = (1-\nu_p^2)/E_p + (1-\nu_m^2)/E_m$  and  $1/R = 1/R_p + 1/R_m$ . In the Eq. (S18), the first term was the classical Hertz (1896) [22] contact force, the second term was the classical interfacial adhesion derived by Kendall (1971) [27], the third term was the air pressure applied on the contact region, and the fourth term was the membranous tension. The third and the fourth terms were correlated with the characteristics of the membrane.

According to the Fung (2013) [24], the tension of the per unit length, related to the uniform material, was formulated as  $PR_m/2$ . The outer perimeter contact region, as shown in Fig. S6, was  $2\pi a$ . Therefore, the membranous tension applied the whole contact outer circle was



$2\pi a(PR_m/2)$ . The fourth term was the membranous tension projected to the indentation direction. According to the geometry as shown in Fig. S6, one could easily obtain that

$$\sin\left(\frac{\pi}{2} - \theta\right) = \cos\theta = \frac{a}{R_p} \quad (\text{S19})$$

Substituting Eq. (S19) into Eq. (S18), we obtained

$$\begin{aligned} F &= \frac{4E^*a^3}{3R} - \sqrt{8\pi\gamma E^*a^3} - P\pi a^2 - 2\pi a\left(\frac{PR_m}{2}\right)\sin\left(\frac{\pi}{2} - \theta\right) \\ &= \frac{4E^*a^3}{3R} - \sqrt{8\pi\gamma E^*a^3} - P\pi a^2 - 2\pi a\left(\frac{PR_m}{2}\right)\frac{a}{R_p} \\ &= \frac{4E^*a^3}{3R} - \sqrt{8\pi\gamma E^*a^3} - P\pi a^2\left(1 + \frac{R_m}{R_p}\right) \\ &= \frac{4E^*a^3}{3R} - \sqrt{8\pi\gamma E^*a^3} - P\pi a^2\left(\frac{R_p + R_m}{R_p}\right) \end{aligned} \quad (\text{S20})$$

The effective radius could be rewritten as

$$\frac{1}{R_p} + \frac{1}{R_m} = \frac{R_p + R_m}{R_p R_m} = \frac{1}{R} \quad (\text{S21})$$

Thus, we have

$$\frac{R_p + R_m}{R_p} = \frac{R_m}{R} \quad (\text{S22})$$

Substituting Eq. (S22) into Eq. (S21), we obtained the simplification formula

$$F = \frac{4E^*a^3}{3R} - \sqrt{8\pi\gamma E^*a^3} - P\pi a^2 \frac{R_m}{R} \quad (\text{S23})$$

The Eq. (S23) could be used to describe the contact problem between a small rigid sphere and a soft spherical pure-membrane inflated by air pressures. Physiologically, the intact cornea was inflated by intraocular pressures (IOPs), which was similar to the inflation situation of a balloon. Different from a pure membrane, the corneal thickness should not be ignored. Accordingly, we introduced a power-coefficient  $\alpha$  into Eq. (S23) to estimate the tendency degree of the cornea trended to the membrane. Therefore, replacing the  $R_m$  term by the corneal radius of curvature  $R_c$  in Eq. (S23), we obtained the equilibrium formula of an intact inflated cornea contacted by a small rigid sphere, i.e., Eq. (1) in the manuscript.

## Supplementary Information VI: The detailed experimental data related to each sample under 20 mmHg-IOP

**Table S1.** The detailed experimental data of each cornea under normal IOP of 20 mmHg.

| sample   | $R_p$ (mm) | $\delta_m$ (mm) | $R_c$ (mm) | $R$ (mm) | $a_c$ (mm) | $F_{ad}$ (mN) | $\gamma$ (mN/mm) | $E^*$ (kPa) |
|----------|------------|-----------------|------------|----------|------------|---------------|------------------|-------------|
| Eye 1-3  | 0.5        | 0.031           | 8.3995     | 0.4719   | 0.096      | 0.972         | 0.5137           | 981.73      |
| Eye 3-1  | 0.5        | 0.031           | 9.9042     | 0.476    | 0.092      | 0.2313        | 0.134            | 245.82      |
| Eye 3-3  | 0.5        | 0.035           | 9.9042     | 0.476    | 0.1131     | 1.3172        | 0.5769           | 995.31      |
| Eye 5-1  | 0.5        | 0.04            | 9.5986     | 0.4752   | 0.1008     | 0.7585        | 0.4752           | 867.26      |
| Eye 5-2  | 0.5        | 0.029           | 9.5986     | 0.4752   | 0.2619     | 0.7173        | 0.0481           | 64.41       |
| Eye 5-3  | 0.5        | 0.019           | 9.5986     | 0.4752   | 0.1026     | 0.9265        | 0.2662           | 367.81      |
| Eye 6-1  | 0.5        | 0.03            | 8.275      | 0.4715   | 0.106      | 1.2544        | 0.526            | 489.79      |
| Eye 6-2  | 0.5        | 0.029           | 8.275      | 0.4715   | 0.099      | 1.1709        | 0.5552           | 572.39      |
| Eye 6-3  | 0.5        | 0.029           | 8.275      | 0.4715   | 0.092      | 1.1946        | 0.6492           | 676.25      |
| Eye 7-1  | 0.5        | 0.022           | 8.8092     | 0.4731   | 0.1115     | 1.0934        | 0.3136           | 303.02      |
| Eye 7-2  | 0.5        | 0.024           | 8.8092     | 0.4731   | 0.1465     | 1.2831        | 0.2322           | 152.22      |
| Eye 7-3  | 0.5        | 0.026           | 8.8092     | 0.4731   | 0.0985     | 1.1194        | 0.4738           | 529.22      |
| Eye 8-1  | 0.5        | 0.032           | 8.2887     | 0.4716   | 0.1365     | 1.3097        | 0.3546           | 302.29      |
| Eye 8-2  | 0.5        | 0.032           | 8.2887     | 0.4716   | 0.1035     | 1.2961        | 0.6143           | 589.68      |
| Eye 8-3  | 0.5        | 0.037           | 8.2887     | 0.4716   | 0.0915     | 1.3207        | 0.9164           | 804.32      |
| Eye 9-1  | 0.5        | 0.03            | 9.1623     | 0.4741   | 0.1175     | 1.4817        | 0.5124           | 369.19      |
| Eye 9-2  | 0.5        | 0.031           | 9.1623     | 0.4741   | 0.093      | 1.5717        | 0.9024           | 741.02      |
| Eye 9-3  | 0.5        | 0.029           | 9.1623     | 0.4741   | 0.099      | 1.5404        | 0.7154           | 723.08      |
| Eye 10-1 | 0.5        | 0.03            | 9.7264     | 0.4756   | 0.081      | 1.0726        | 0.7806           | 732.08      |
| Eye 10-2 | 0.5        | 0.03            | 9.7264     | 0.4756   | 0.1015     | 1.478         | 0.6941           | 901.98      |
| Eye 10-3 | 0.5        | 0.038           | 9.7264     | 0.4756   | 0.097      | 1.3224        | 0.8478           | 803.09      |
| Eye 1-1  | 1          | 0.0372          | 9.0084     | 0.9001   | 0.1534     | 1.5619        | 0.3931           | 854.65      |
| Eye 1-2  | 1          | 0.0450          | 9.0084     | 0.9001   | 0.1539     | 1.2186        | 0.3686           | 711.95      |
| Eye 3-2  | 1          | 0.0429          | 11.0478    | 0.9170   | 0.1864     | 2.1772        | 0.4280           | 305.92      |
| Eye 4-2  | 1          | 0.0320          | 10.2979    | 0.9115   | 0.1440     | 0.4872        | 0.1197           | 226.53      |
| Eye 4-3  | 1          | 0.0594          | 10.2979    | 0.9115   | 0.1713     | 1.2827        | 0.4135           | 609.36      |
| Eye 7-1  | 1          | 0.0281          | 9.7906     | 0.9073   | 0.1460     | 1.5094        | 0.3167           | 427.81      |
| Eye 7-2  | 1          | 0.0264          | 9.7906     | 0.9073   | 0.1420     | 1.8934        | 0.3946           | 951.30      |
| Eye 8-1  | 1          | 0.0273          | 9.6244     | 0.9059   | 0.1995     | 1.6367        | 0.1787           | 148.09      |
| Eye 8-2  | 1          | 0.0252          | 9.6244     | 0.9059   | 0.1780     | 1.5161        | 0.1919           | 210.53      |
| Eye 8-3  | 1          | 0.0294          | 9.6244     | 0.9059   | 0.1815     | 1.7520        | 0.2489           | 262.10      |

|          |     |        |         |        |        |        |        |        |
|----------|-----|--------|---------|--------|--------|--------|--------|--------|
| Eye 9-2  | 1   | 0.0289 | 8.5972  | 0.8958 | 0.1900 | 1.6511 | 0.2104 | 230.36 |
| Eye 9-3  | 1   | 0.0290 | 8.5972  | 0.8958 | 0.2245 | 1.7461 | 0.1599 | 121.11 |
| Eye 10-1 | 1   | 0.0300 | 10.9740 | 0.9165 | 0.2030 | 1.9861 | 0.2301 | 282.76 |
| Eye 10-2 | 1   | 0.0329 | 10.9740 | 0.9165 | 0.1720 | 1.9977 | 0.3536 | 480.29 |
| Eye 11-1 | 1   | 0.0313 | 8.2727  | 0.8922 | 0.1970 | 1.5566 | 0.1998 | 232.66 |
| Eye 11-2 | 1   | 0.0292 | 8.2727  | 0.8922 | 0.1865 | 1.5611 | 0.2086 | 295.59 |
| Eye 11-3 | 1   | 0.0305 | 8.2727  | 0.8922 | 0.1690 | 1.7316 | 0.2943 | 535.96 |
| Eye 12-1 | 1   | 0.0302 | 9.7043  | 0.9066 | 0.1530 | 2.0842 | 0.4280 | 598.80 |
| Eye 12-2 | 1   | 0.0298 | 9.7043  | 0.9066 | 0.1685 | 2.2384 | 0.3739 | 659.09 |
| Eye 12-3 | 1   | 0.0340 | 9.7043  | 0.9066 | 0.1585 | 2.1607 | 0.4654 | 854.07 |
| Eye 3-1  | 2   | 0.0302 | 10.4245 | 1.6781 | 0.2234 | 2.8601 | 0.2755 | 641.43 |
| Eye 4-1  | 2   | 0.0273 | 9.0958  | 1.6395 | 0.2175 | 2.3156 | 0.2127 | 326.29 |
| Eye 4-2  | 2   | 0.0350 | 9.0958  | 1.6395 | 0.2525 | 3.1604 | 0.2761 | 330.96 |
| Eye 4-3  | 2   | 0.0312 | 9.0958  | 1.6395 | 0.2115 | 2.6650 | 0.2958 | 384.76 |
| Eye 5-1  | 2   | 0.0387 | 9.2409  | 1.6442 | 0.1960 | 3.2341 | 0.5185 | 671.65 |
| Eye 5-2  | 2   | 0.0352 | 9.2409  | 1.6442 | 0.2215 | 3.2685 | 0.3732 | 870.38 |
| Eye 5-3  | 2   | 0.0371 | 9.2409  | 1.6442 | 0.2580 | 3.5919 | 0.3186 | 334.25 |
| Eye 6-1  | 2   | 0.0327 | 9.0778  | 1.6389 | 0.2700 | 1.9627 | 0.1401 | 196.08 |
| Eye 6-2  | 2   | 0.0425 | 9.0778  | 1.6389 | 0.2730 | 1.6400 | 0.1488 | 244.16 |
| Eye 6-3  | 2   | 0.0281 | 9.0778  | 1.6389 | 0.1335 | 2.2115 | 0.5550 | 877.58 |
| Eye 7-1  | 2   | 0.0269 | 8.6938  | 1.6260 | 0.1990 | 2.2464 | 0.2429 | 271.87 |
| Eye 7-2  | 2   | 0.0267 | 8.6938  | 1.6260 | 0.2190 | 1.7821 | 0.1579 | 328.13 |
| Eye 7-3  | 2   | 0.0316 | 8.6938  | 1.6260 | 0.2235 | 2.2932 | 0.2309 | 374.74 |
| Eye 8-1  | 2   | 0.0267 | 9.3296  | 1.6469 | 0.2180 | 2.8616 | 0.2559 | 350.97 |
| Eye 8-2  | 2   | 0.0325 | 9.3296  | 1.6469 | 0.2605 | 2.9431 | 0.2243 | 294.41 |
| Eye 8-3  | 2   | 0.0316 | 9.3296  | 1.6469 | 0.2450 | 2.4084 | 0.2018 | 227.50 |
| Eye 9-1  | 2   | 0.0489 | 9.8072  | 1.6612 | 0.2370 | 2.4542 | 0.3401 | 408.69 |
| Eye 9-2  | 2   | 0.0381 | 9.8072  | 1.6612 | 0.2745 | 3.1586 | 0.2542 | 365.46 |
| Eye 9-3  | 2   | 0.0396 | 9.8072  | 1.6612 | 0.2670 | 2.8651 | 0.2533 | 303.00 |
| Eye 1-2  | 2.5 | 0.0525 | 10.0694 | 2.0028 | 0.1853 | 3.2792 | 0.1995 | 32.48  |
| Eye 1-3  | 2.5 | 0.0490 | 10.0694 | 2.0028 | 0.1836 | 4.5601 | 0.2639 | 101.64 |
| Eye 2-2  | 2.5 | 0.0271 | 9.7732  | 1.9908 | 0.1990 | 1.8844 | 0.2052 | 164.19 |
| Eye 3-1  | 2.5 | 0.0371 | 9.7479  | 1.9897 | 0.1935 | 1.8030 | 0.2843 | 367.56 |
| Eye 5-2  | 2.5 | 0.0364 | 9.5760  | 1.9824 | 0.1923 | 1.9253 | 0.3018 | 665.70 |
| Eye 6-1  | 2.5 | 0.0382 | 9.3548  | 1.9728 | 0.1800 | 1.9408 | 0.3642 | 599.83 |
| Eye 7-1  | 2.5 | 0.0423 | 9.4994  | 1.9791 | 0.1485 | 1.8533 | 0.5658 | 296.51 |

|          |     |        |        |        |        |        |        |        |
|----------|-----|--------|--------|--------|--------|--------|--------|--------|
| Eye 7-2  | 2.5 | 0.0323 | 9.4994 | 1.9791 | 0.2158 | 2.3856 | 0.2635 | 343.37 |
| Eye 8-1  | 2.5 | 0.0331 | 9.4943 | 1.9789 | 0.1835 | 2.4589 | 0.3847 | 585.18 |
| Eye 8-2  | 2.5 | 0.0319 | 9.4943 | 1.9789 | 0.1810 | 2.5905 | 0.4015 | 548.53 |
| Eye 10-1 | 2.5 | 0.0282 | 9.5441 | 1.9811 | 0.1755 | 2.2392 | 0.3263 | 612.70 |
| Eye 10-2 | 2.5 | 0.0292 | 9.5441 | 1.9811 | 0.1750 | 2.2745 | 0.3452 | 352.93 |
| Eye 11-3 | 2.5 | 0.0448 | 9.7273 | 1.9889 | 0.2460 | 4.1246 | 0.4860 | 721.12 |
| Eye 12-1 | 2.5 | 0.0295 | 9.6605 | 1.9860 | 0.1900 | 2.4756 | 0.3220 | 486.95 |
| Eye 12-2 | 2.5 | 0.0350 | 9.6605 | 1.9860 | 0.2650 | 2.7834 | 0.2208 | 239.61 |
| Eye 13-3 | 2.5 | 0.0360 | 9.8607 | 1.9944 | 0.2040 | 2.2522 | 0.3101 | 503.25 |
| Eye 1-1  | 3   | 0.0368 | 9.6991 | 2.2913 | 0.2600 | 2.8191 | 0.2443 | 326.49 |
| Eye 1-2  | 3   | 0.0294 | 9.6991 | 2.2913 | 0.2955 | 2.4336 | 0.1304 | 228.67 |
| Eye 1-3  | 3   | 0.0305 | 9.6991 | 2.2913 | 0.3035 | 2.5075 | 0.1321 | 173.21 |
| Eye 2-1  | 3   | 0.0350 | 9.3077 | 2.2687 | 0.2800 | 2.3928 | 0.1700 | 243.25 |
| Eye 2-2  | 3   | 0.0334 | 9.3077 | 2.2687 | 0.2730 | 1.9648 | 0.1401 | 215.86 |
| Eye 3-1  | 3   | 0.0327 | 9.5402 | 2.2823 | 0.3025 | 1.9777 | 0.1125 | 145.71 |
| Eye 3-2  | 3   | 0.0296 | 9.5402 | 2.2823 | 0.2945 | 2.4152 | 0.1312 | 272.52 |
| Eye 4-1  | 3   | 0.0331 | 8.5696 | 2.2221 | 0.2745 | 2.5212 | 0.1763 | 427.34 |
| Eye 4-2  | 3   | 0.0302 | 8.5696 | 2.2221 | 0.3055 | 2.4319 | 0.1252 | 199.60 |
| Eye 5-1  | 3   | 0.0308 | 9.7508 | 2.2942 | 0.2550 | 2.5703 | 0.1938 | 495.85 |
| Eye 5-2  | 3   | 0.0319 | 9.7508 | 2.2942 | 0.2770 | 2.8178 | 0.1865 | 340.80 |
| Eye 5-3  | 3   | 0.0329 | 9.7508 | 2.2942 | 0.2955 | 2.7933 | 0.1675 | 318.50 |
| Eye 6-1  | 3   | 0.0362 | 9.3855 | 2.2733 | 0.2680 | 3.7598 | 0.3016 | 599.43 |
| Eye 6-2  | 3   | 0.0339 | 9.3855 | 2.2733 | 0.2970 | 2.8141 | 0.1721 | 346.78 |
| Eye 7-1  | 3   | 0.0296 | 9.7838 | 2.2960 | 0.2715 | 2.8995 | 0.1853 | 345.24 |
| Eye 7-2  | 3   | 0.0327 | 9.7838 | 2.2960 | 0.3120 | 2.5379 | 0.1357 | 271.39 |
| Eye 7-3  | 3   | 0.0423 | 9.7838 | 2.2960 | 0.2445 | 3.1165 | 0.3510 | 787.10 |
| Eye 8-1  | 3   | 0.0516 | 9.9080 | 2.3028 | 0.2845 | 2.3521 | 0.2387 | 480.15 |
| Eye 8-2  | 3   | 0.0546 | 9.9080 | 2.3028 | 0.2410 | 2.6310 | 0.3937 | 656.81 |
| Eye 8-3  | 3   | 0.0495 | 9.9080 | 2.3028 | 0.2585 | 2.8922 | 0.3410 | 689.13 |
| Eye 9-2  | 3   | 0.0409 | 9.3521 | 2.2714 | 0.2565 | 2.9733 | 0.2942 | 676.75 |
| Eye 9-3  | 3   | 0.0368 | 9.3521 | 2.2714 | 0.2565 | 3.1253 | 0.2782 | 518.57 |
| Eye 10-1 | 3   | 0.0375 | 9.3353 | 2.2704 | 0.2535 | 2.4300 | 0.2257 | 397.04 |
| Eye 10-2 | 3   | 0.0335 | 9.3353 | 2.2704 | 0.3120 | 3.6115 | 0.1978 | 323.56 |
| Eye 10-3 | 3   | 0.0371 | 9.3353 | 2.2704 | 0.2275 | 3.5816 | 0.4086 | 590.24 |
| Eye 11-1 | 3   | 0.0300 | 9.1342 | 2.2583 | 0.2850 | 2.5047 | 0.1472 | 325.48 |
| Eye 11-2 | 3   | 0.0321 | 9.1342 | 2.2583 | 0.2940 | 2.5733 | 0.1521 | 242.03 |

|          |   |        |         |        |        |        |        |        |
|----------|---|--------|---------|--------|--------|--------|--------|--------|
| Eye 1-1  | 4 | 0.0475 | 9.4516  | 2.8105 | 0.3307 | 3.1079 | 0.2149 | 258.99 |
| Eye 1-2  | 4 | 0.0357 | 9.4516  | 2.8105 | 0.3176 | 2.2022 | 0.1241 | 135.45 |
| Eye 2-1  | 4 | 0.0571 | 9.6066  | 2.8241 | 0.3201 | 3.7875 | 0.3360 | 370.14 |
| Eye 2-2  | 4 | 0.0414 | 9.6066  | 2.8241 | 0.3139 | 3.0860 | 0.2063 | 349.58 |
| Eye 2-3  | 4 | 0.0697 | 9.6066  | 2.8241 | 0.3951 | 3.4197 | 0.2430 | 221.54 |
| Eye 7-1  | 4 | 0.0348 | 9.8056  | 2.8411 | 0.3522 | 3.4320 | 0.1533 | 217.31 |
| Eye 7-3  | 4 | 0.0363 | 9.8056  | 2.8411 | 0.3558 | 3.2206 | 0.1470 | 187.42 |
| Eye 9-1  | 4 | 0.0382 | 9.9393  | 2.8522 | 0.2993 | 3.8109 | 0.2586 | 574.97 |
| Eye 9-2  | 4 | 0.0360 | 9.9393  | 2.8522 | 0.3685 | 3.1514 | 0.1330 | 141.05 |
| Eye 9-3  | 4 | 0.0350 | 9.9393  | 2.8522 | 0.3053 | 2.8353 | 0.1695 | 472.66 |
| Eye 9-1  | 4 | 0.0348 | 9.2548  | 2.7929 | 0.2500 | 2.0359 | 0.1804 | 466.02 |
| Eye 9-2  | 4 | 0.0419 | 9.2548  | 2.7929 | 0.3045 | 2.6782 | 0.1926 | 470.78 |
| Eye 9-3  | 4 | 0.0415 | 9.2548  | 2.7929 | 0.2375 | 2.4930 | 0.2919 | 610.43 |
| Eye 10-2 | 4 | 0.0454 | 9.7173  | 2.8336 | 0.3050 | 4.1876 | 0.3253 | 615.29 |
| Eye 10-3 | 4 | 0.0447 | 9.7173  | 2.8336 | 0.3635 | 3.8141 | 0.2054 | 463.95 |
| Eye 11-1 | 4 | 0.0404 | 9.3238  | 2.7991 | 0.3440 | 2.7567 | 0.1498 | 284.05 |
| Eye 11-2 | 4 | 0.0385 | 9.3238  | 2.7991 | 0.3320 | 2.7852 | 0.1548 | 384.97 |
| Eye 11-3 | 4 | 0.0391 | 9.3238  | 2.7991 | 0.2445 | 2.7998 | 0.2915 | 563.51 |
| Eye 12-2 | 4 | 0.0735 | 9.2800  | 2.7952 | 0.2980 | 3.0443 | 0.4010 | 664.31 |
| Eye 12-3 | 4 | 0.0579 | 9.2800  | 2.7952 | 0.3340 | 3.3706 | 0.2784 | 587.87 |
| Eye 13-1 | 4 | 0.0429 | 9.0554  | 2.7745 | 0.2385 | 2.5008 | 0.3002 | 468.80 |
| Eye 13-2 | 4 | 0.0350 | 9.0554  | 2.7745 | 0.3135 | 2.9726 | 0.1685 | 294.13 |
| Eye 1-1  | 5 | 0.0369 | 8.6917  | 3.1741 | 0.2990 | 4.0790 | 0.2680 | 498.91 |
| Eye 1-2  | 5 | 0.0369 | 8.6917  | 3.1741 | 0.3005 | 3.8632 | 0.2513 | 489.97 |
| Eye 1-3  | 5 | 0.0381 | 8.6917  | 3.1741 | 0.3540 | 3.9562 | 0.1914 | 214.24 |
| Eye 2-1  | 5 | 0.0487 | 9.8306  | 3.3143 | 0.3735 | 5.0833 | 0.2824 | 330.63 |
| Eye 2-2  | 5 | 0.0447 | 9.8306  | 3.3143 | 0.4160 | 4.4950 | 0.1848 | 193.29 |
| Eye 2-3  | 5 | 0.0423 | 9.8306  | 3.3143 | 0.4375 | 5.1808 | 0.1822 | 214.58 |
| Eye 3-1  | 5 | 0.0310 | 9.7860  | 3.3092 | 0.3060 | 2.6110 | 0.1376 | 370.34 |
| Eye 3-2  | 5 | 0.0388 | 9.7860  | 3.3092 | 0.4285 | 2.6002 | 0.0875 | 108.31 |
| Eye 3-3  | 5 | 0.0385 | 9.7860  | 3.3092 | 0.3420 | 3.6812 | 0.1929 | 236.71 |
| Eye 4-1  | 5 | 0.0373 | 10.1445 | 3.3492 | 0.3430 | 2.8982 | 0.1462 | 233.66 |
| Eye 4-2  | 5 | 0.0358 | 10.1445 | 3.3492 | 0.3230 | 3.0751 | 0.1679 | 331.49 |
| Eye 4-3  | 5 | 0.0345 | 10.1445 | 3.3492 | 0.3080 | 3.4237 | 0.1982 | 375.28 |
| Eye 4-4  | 5 | 0.0339 | 10.1445 | 3.3492 | 0.3280 | 3.4342 | 0.1722 | 462.20 |
| Eye 5-2  | 5 | 0.0331 | 9.9543  | 3.3282 | 0.3380 | 2.9234 | 0.1348 | 395.55 |

---

|          |   |        |         |        |        |        |        |        |
|----------|---|--------|---------|--------|--------|--------|--------|--------|
| Eye 5-4  | 5 | 0.0346 | 9.9543  | 3.3282 | 0.2605 | 4.0008 | 0.3247 | 615.54 |
| Eye 6-1  | 5 | 0.0585 | 8.8753  | 3.1982 | 0.3575 | 3.4653 | 0.2525 | 276.82 |
| Eye 6-2  | 5 | 0.0442 | 8.8753  | 3.1982 | 0.3205 | 3.9452 | 0.2702 | 466.56 |
| Eye 6-3  | 5 | 0.0392 | 8.8753  | 3.1982 | 0.2980 | 3.7206 | 0.2614 | 525.04 |
| Eye 6-4  | 5 | 0.0475 | 8.8753  | 3.1982 | 0.4310 | 4.0401 | 0.1644 | 152.26 |
| Eye 7-1  | 5 | 0.0658 | 8.6379  | 3.1669 | 0.2875 | 4.1067 | 0.5203 | 584.89 |
| Eye 7-2  | 5 | 0.0370 | 8.6379  | 3.1669 | 0.4055 | 4.5732 | 0.1638 | 186.89 |
| Eye 8-1  | 5 | 0.0469 | 10.2505 | 3.3607 | 0.3425 | 4.4920 | 0.2858 | 410.11 |
| Eye 8-2  | 5 | 0.0427 | 10.2505 | 3.3607 | 0.3370 | 4.5347 | 0.2714 | 452.47 |
| Eye 8-3  | 5 | 0.0423 | 10.2505 | 3.3607 | 0.4165 | 4.9783 | 0.1932 | 191.62 |
| Eye 8-4  | 5 | 0.0429 | 10.2505 | 3.3607 | 0.3135 | 5.4068 | 0.3756 | 687.52 |
| Eye 9-1  | 5 | 0.0361 | 9.1110  | 3.2283 | 0.3465 | 3.7063 | 0.1774 | 327.54 |
| Eye 9-2  | 5 | 0.0350 | 9.1110  | 3.2283 | 0.2645 | 3.6963 | 0.2943 | 617.81 |
| Eye 10-2 | 5 | 0.0408 | 9.6223  | 3.2903 | 0.2870 | 3.9674 | 0.3128 | 587.60 |
| Eye 10-3 | 5 | 0.0398 | 9.6223  | 3.2903 | 0.3000 | 4.1832 | 0.2944 | 637.34 |
| Eye 10-4 | 5 | 0.0459 | 9.6223  | 3.2903 | 0.3540 | 4.4653 | 0.2603 | 386.18 |

---
